# Supplementary material
Source: PubMed Central journal article supplement (PMC3475409)

# Supplementary Figure 1

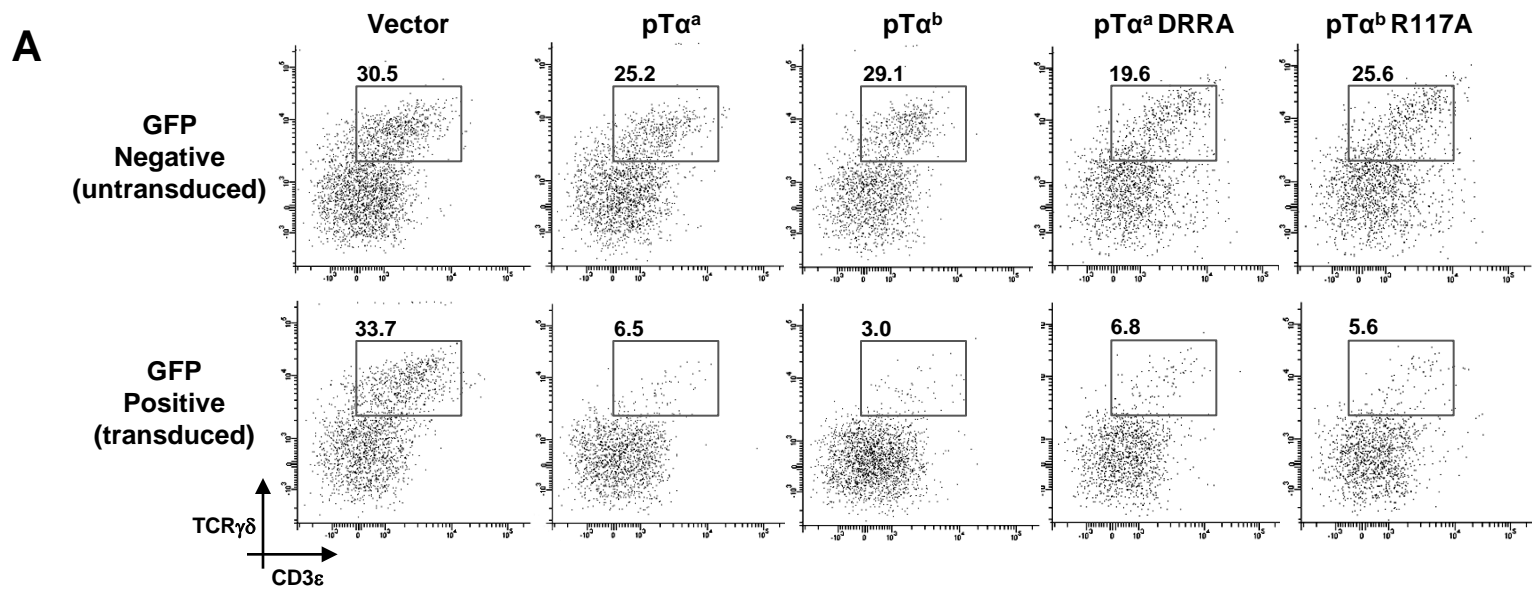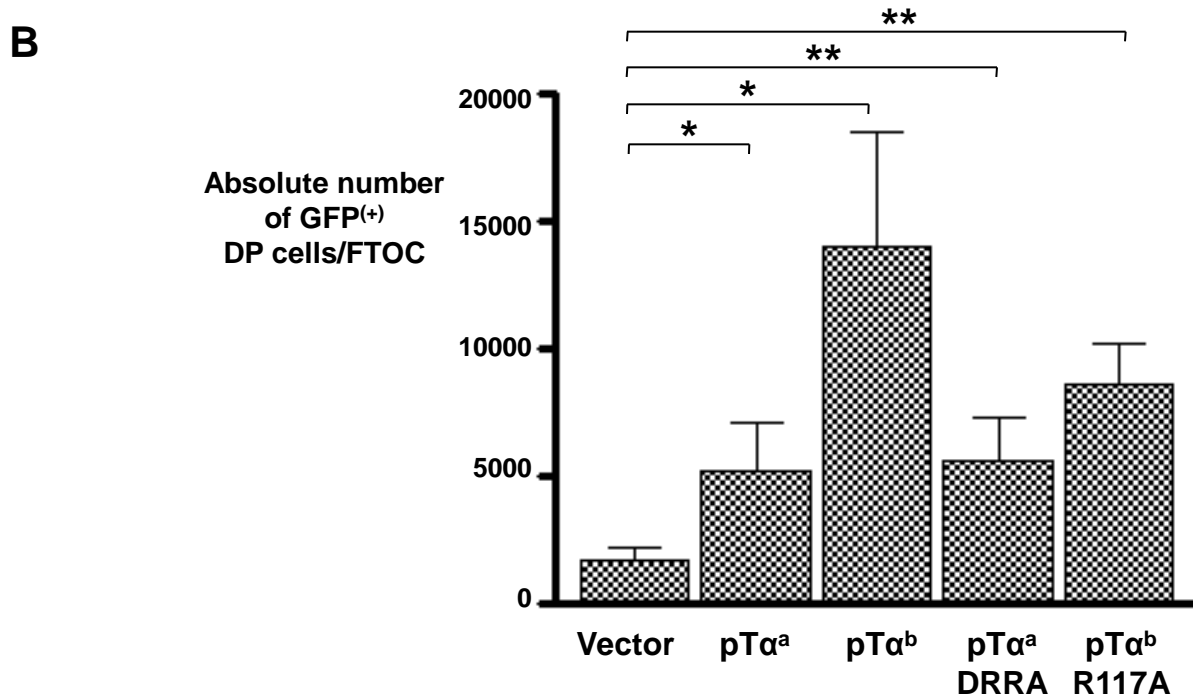

# Supplementary Figure 2

## A

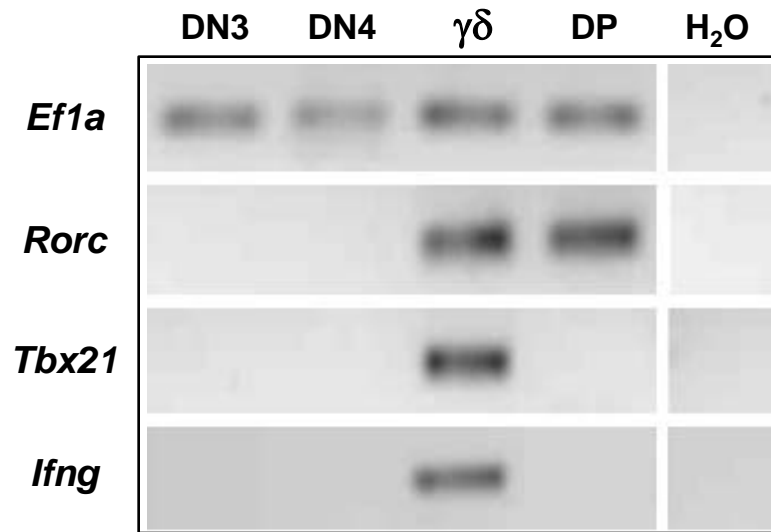

## B

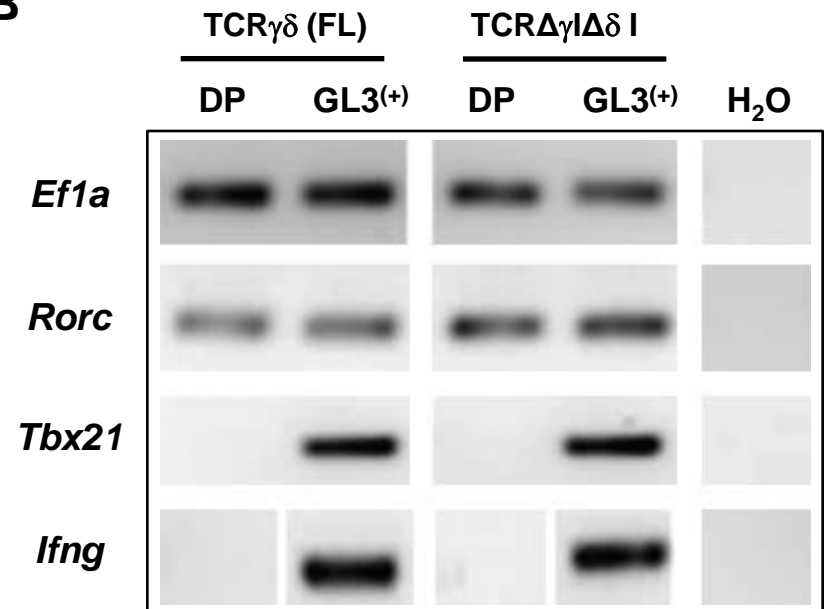

# Supplementary Figure 3

**A****RAG-2<sup>-/-</sup> background**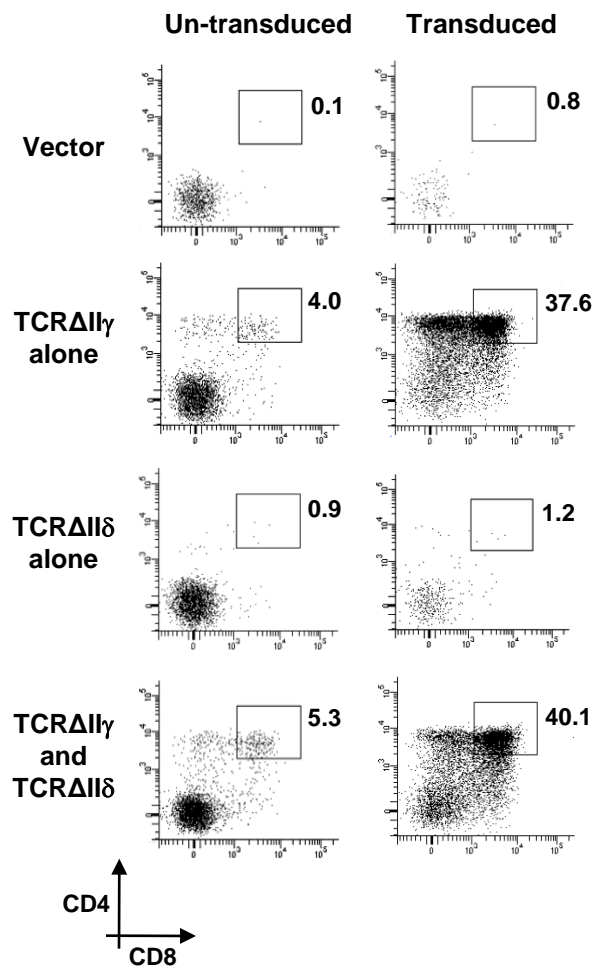**B****pTα<sup>-/-</sup>.TCRδ<sup>-/-</sup> background**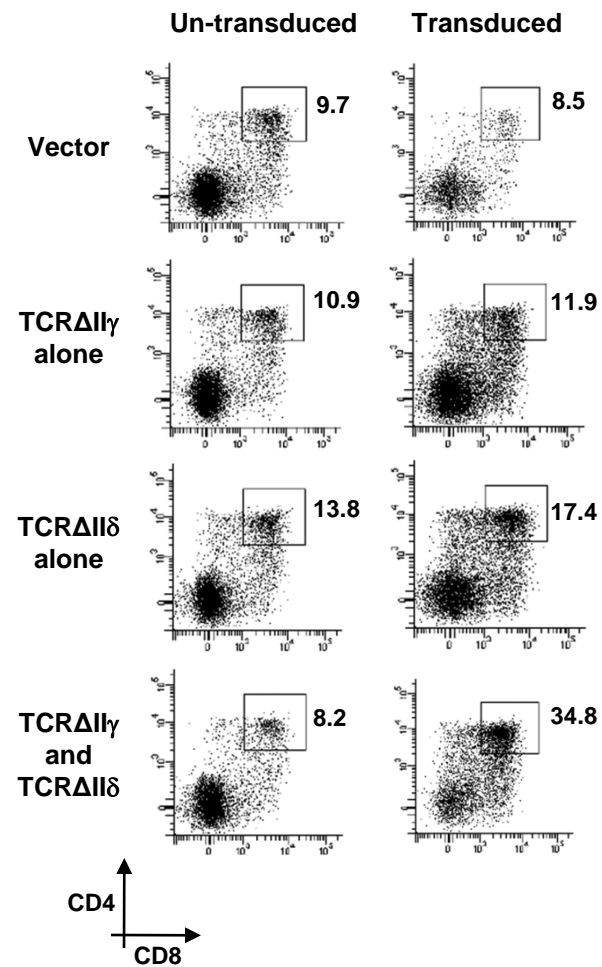

Supplement: NIHMS50112-supplement-01.pdf [file NIHMS50112-supplement-01.pdf]
